# Supplementary material for: Race/Ethnicity and Geographic Access to Urban Trauma Care
Source: PubMed Central journal article supplement (PMC6484639; doi:10.1001/jamanetworkopen.2019.0138), 2019-03-08
Supplement: jamanetwopen-2-e190138-s001.pdf [file jamanetwopen-2-e190138-s001.pdf]

## Supplementary Online Content

Tung EL, Hampton DA, Kolak M, Rogers SO, Yang JP, Peek ME. Race/ethnicity and geographic access to urban trauma care. *JAMA Netw Open*. 2019;2(3):e190138. doi:10.1001/jamanetworkopen.2019.0138

**eTable 1.** Characteristics of High and Low Access Clusters in Univariate LISA Models, Chicago, New York City, and Los Angeles, 2015

**eTable 2.** Access to Trauma Centers by Census Tract Racial/Ethnic Composition and Poverty, Chicago after Level I Trauma Center Opened at University of Chicago in May, 2018

This supplementary material has been provided by the authors to give readers additional information about their work.

**eTable 1.** Characteristics of High and Low Access Clusters in Univariate LISA Models, Chicago, New York City, and Los Angeles, 2015

|                                      | <b>Chicago</b>       |                                  | <b>Los Angeles</b>   |                                  | <b>New York City</b> |                                  |
|--------------------------------------|----------------------|----------------------------------|----------------------|----------------------------------|----------------------|----------------------------------|
|                                      | High Access<br>n=185 | Low Access <sup>a</sup><br>n=131 | High Access<br>n=182 | Low Access <sup>a</sup><br>n=151 | High Access<br>n=428 | Low Access <sup>a</sup><br>n=212 |
| Census Tract Characteristics         | % or mean (sd)       |                                  | % or mean (sd)       |                                  | % or mean (sd)       |                                  |
| Total residents                      |                      |                                  |                      |                                  |                      |                                  |
| < 2000                               | 46 (24.9)            | 25 (19.1)                        | 3 (1.7)              | 5 (3.3)                          | 39 (9.1)             | 39 (18.4)                        |
| 2000-3999                            | 82 (44.3)            | 66 (50.4)                        | 108 (59.3)           | 72 (47.7)                        | 160 (37.4)           | 88 (41.5)                        |
| 4000-5999                            | 42 (22.7)            | 34 (26.0)                        | 61 (33.5)            | 65 (43.1)                        | 129 (30.1)           | 60 (28.3)                        |
| 6000+                                | 15 (8.1)             | 6 (4.6)                          | 10 (5.5)             | 9 (6.0)                          | 100 (23.4)           | 25 (11.8)                        |
| Racial/ethnic composition            |                      |                                  |                      |                                  |                      |                                  |
| White majority                       | 102 (55.1)           | 22 (16.8)                        | 37 (20.3)            | 91 (60.3)                        | 113 (26.4)           | 100 (47.2)                       |
| Black majority                       | 30 (16.2)            | 83 (63.4)                        | 2 (1.1)              | 5 (3.3)                          | 115 (26.9)           | 62 (29.3)                        |
| Hispanic/Latino majority             | 30 (16.2)            | 15 (11.5)                        | 100 (55.0)           | 35 (23.2)                        | 103 (24.1)           | 0 (0)                            |
| Other majority/integrated            | 23 (12.4)            | 11 (8.4)                         | 43 (23.6)            | 20 (13.3)                        | 97 (22.7)            | 50 (23.6)                        |
| Median household income <sup>b</sup> |                      |                                  |                      |                                  |                      |                                  |
| < \$50K                              | 75 (40.5)            | 99 (75.6)                        | 106 (58.9)           | 50 (33.6)                        | 252 (58.9)           | 53 (25.0)                        |
| \$50K-\$99K                          | 71 (38.4)            | 31 (23.7)                        | 66 (36.7)            | 76 (51.0)                        | 116 (27.1)           | 149 (70.3)                       |
| \$100K-149K                          | 38 (20.5)            | 1 (0.8)                          | 5 (2.8)              | 17 (11.4)                        | 52 (12.2)            | 10 (4.7)                         |
| \$150K+                              | 1 (0.5)              | 0 (0)                            | 3 (1.7)              | 6 (4.0)                          | 8 (1.9)              | 0 (0)                            |
| Travel distance (km)                 | 2.6 (1.3)            | 15.3 (2.6)                       | 2.9 (1.1)            | 14.6 (2.3)                       | 1.4 (0.5)            | 10.8 (3.1)                       |

<sup>a</sup>Low access was defined based on relative travel distance in univariate LISA models

<sup>b</sup>Income data were not available for a small number of census tracts in Los Angeles (n=4)

**eTable 2.** Access to Trauma Centers by Census Tract Racial/Ethnic Composition and Poverty, Chicago after Level I Trauma Center Opened at University of Chicago in May, 2018

|                                   | Distance > 8 Kilometers from Nearest Trauma Center <sup>a</sup> |                        |                                      |                                      |
|-----------------------------------|-----------------------------------------------------------------|------------------------|--------------------------------------|--------------------------------------|
| Census Tract Characteristic       | No. (%)                                                         | Model 1<br>OR (95% CI) | Model 2<br>AOR (95% CI) <sup>b</sup> | Model 3<br>AOR (95% CI) <sup>c</sup> |
| <b>Chicago (n=798)</b>            |                                                                 |                        |                                      |                                      |
| Racial/ethnic composition         |                                                                 |                        |                                      |                                      |
| White majority                    | 52 (21.5)                                                       | Ref                    | Ref                                  | Ref                                  |
| Black majority                    | 86 (30.7)                                                       | 1.62 (1.09-2.41)*      | 1.85 (1.09-3.15)*                    | 1.25 (0.50-3.13)                     |
| Hispanic/Latino majority          | 69 (41.1)                                                       | 2.55 (1.65-3.93)***    | 2.86 (1.67-4.90)***                  | 2.90 (1.30-6.46)**                   |
| Other majority or integrated      | 14 (13.0)                                                       | 0.54 (0.29-1.03)       | 0.59 (0.30-1.15)                     | 0.81 (0.35-1.88)                     |
| Concentrated poverty <sup>d</sup> |                                                                 |                        |                                      |                                      |
| Nonpoor                           | 74 (24.0)                                                       | Ref                    | Ref                                  | Ref                                  |
| Poor                              | 147 (30.1)                                                      | 1.37 (0.99-1.89)       | 0.85 (0.54-1.34)                     | 0.82 (0.32-2.12)                     |

<sup>a</sup>Calculated as travel distance from census tract centroid based on previously published definitions by Crandall and colleagues; included trauma centers designated as level 1 or level 2 by state health departments

<sup>b</sup>Model 2 included racial/ethnic composition and poverty status

<sup>c</sup>Model 3 included racial/ethnic composition, poverty status, and race-poverty interaction effects

<sup>d</sup>Poor was defined as a median household income < 200% federal poverty level for a household of 4

\*P < 0.05, \*\*P < 0.01, \*\*\*P < 0.001
